# Supplementary material for: Relationship Functioning and Gut Microbiota Composition among Older Adult Couples
Source: MDPI journal article supplement (doi:10.3390/ijerph20085435), 2023-04-07

**Figure S2.** Relative abundance of gut microorganisms at the phylum level. Letters on top of the panels represent couple IDs, and labels on the x axis represent the two participants within each couple.

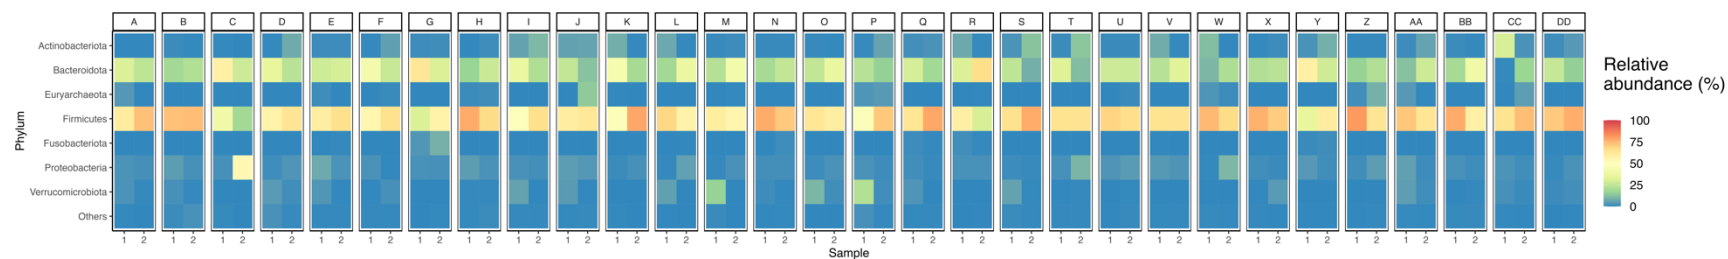

Supplement: s1 [file s1]
