# Supplementary material for: Relationship Functioning and Gut Microbiota Composition among Older Adult Couples
Source: MDPI journal article supplement (doi:10.3390/ijerph20085435), 2023-04-07
Supplement: s1 [file s1]

**Table S1.** Variable selection.

| Categories of measures         | Measures included in 1 <sup>st</sup> “capscale”                                                                                                                                       | Measures selected in 1 <sup>st</sup> “ordiR2step”                            | Measures included in 2 <sup>nd</sup> “capscale”                                                                                                                                       | Measures selected in 2 <sup>nd</sup> “ordiR2step”                |
|--------------------------------|---------------------------------------------------------------------------------------------------------------------------------------------------------------------------------------|------------------------------------------------------------------------------|---------------------------------------------------------------------------------------------------------------------------------------------------------------------------------------|------------------------------------------------------------------|
| Psychosocial                   | <ul style="list-style-type: none"> <li>• Relationship satisfaction</li> <li>• Intimacy</li> <li>• Holding back</li> <li>• Disclosure</li> <li>• Constructive communication</li> </ul> | <ul style="list-style-type: none"> <li>• Holding back</li> </ul>             | <ul style="list-style-type: none"> <li>• Relationship satisfaction</li> <li>• Intimacy</li> <li>• Holding back</li> <li>• Disclosure</li> <li>• Constructive communication</li> </ul> | <ul style="list-style-type: none"> <li>• Holding back</li> </ul> |
| Demographic                    | <ul style="list-style-type: none"> <li>• Age</li> <li>• Gender</li> <li>• Education</li> <li>• Income</li> </ul>                                                                      | <ul style="list-style-type: none"> <li>• Gender</li> <li>• Income</li> </ul> | <ul style="list-style-type: none"> <li>• Gender</li> <li>• Income (set as “Condition”)</li> </ul>                                                                                     |                                                                  |
| Sexual satisfaction            | <ul style="list-style-type: none"> <li>• Sexual satisfaction</li> </ul>                                                                                                               |                                                                              |                                                                                                                                                                                       |                                                                  |
| Medication and chronic disease | <ul style="list-style-type: none"> <li>• Proton pump inhibitor use</li> <li>• Supplement use</li> <li>• Chronic disease</li> </ul>                                                    | <ul style="list-style-type: none"> <li>• Supplement use</li> </ul>           | <ul style="list-style-type: none"> <li>• Supplement use (set as “Condition”)</li> </ul>                                                                                               |                                                                  |
| Dietary intake                 | <ul style="list-style-type: none"> <li>• Added sugar</li> <li>• Calcium</li> <li>• Fiber</li> </ul>                                                                                   |                                                                              |                                                                                                                                                                                       |                                                                  |
