# Supplementary material for: Relationship Functioning and Gut Microbiota Composition among Older Adult Couples
Source: MDPI journal article supplement (doi:10.3390/ijerph20085435), 2023-04-07
Supplement: s1 [file s1]

**Table S2.** Permutational analysis of variance showing associations between two beta diversity ~~distances-indices~~ and the psychosocial measures. P values less than 0.05 are bolded.

| Measure                    | <del>Distance</del> Beta diversity index | Adonis2 R <sup>2</sup> | Adonis2 significance |
|----------------------------|------------------------------------------|------------------------|----------------------|
| Relationship satisfaction  | Jaccard                                  | 2.1e-02                | 5.5e-02              |
|                            | Bray-Curtis                              | 2.3e-02                | 6.3e-02              |
| Intimacy                   | Jaccard                                  | 2.0e-02                | 1.2e-01              |
|                            | Bray-Curtis                              | 2.2e-02                | 1.0e-01              |
| Holding back               | Jaccard                                  | 2.3e-02                | <b>2.2e-02</b>       |
|                            | Bray-Curtis                              | 2.6e-02                | <b>2.3e-02</b>       |
| Disclosure                 | Jaccard                                  | 1.6e-02                | 6.6e-01              |
|                            | Bray-Curtis                              | 1.5e-02                | 7.0e-01              |
| Constructive communication | Jaccard                                  | 2.0e-02                | 8.3e-02              |
|                            | Bray-Curtis                              | 2.3e-02                | 6.3e-02              |
