# Supplementary material for: Relationship Functioning and Gut Microbiota Composition among Older Adult Couples
Source: MDPI journal article supplement (doi:10.3390/ijerph20085435), 2023-04-07
Supplement: s1 [file s1]

**Table S3.** *P* value summary for Figures 2 and 3.

| Figure | Comparisons/correlations                                                                                                                                                                                                                                                                                                                                  | <i>P</i> value                                                                                                                     |
|--------|-----------------------------------------------------------------------------------------------------------------------------------------------------------------------------------------------------------------------------------------------------------------------------------------------------------------------------------------------------------|------------------------------------------------------------------------------------------------------------------------------------|
| 2      | Between non-couple vs Within couple:<br>Jaccard<br>Bray-Curtis                                                                                                                                                                                                                                                                                            | 0.000017<br>0.000017                                                                                                               |
| 3      | Chao1<br>Relationship satisfaction<br>Intimacy<br>Holding back<br>Disclosure<br>Constructive communication<br>Shannon's Diversity<br>Relationship satisfaction<br>Intimacy<br>Holding back<br>Disclosure<br>Constructive communication<br>Faith's PD<br>Relationship satisfaction<br>Intimacy<br>Holding back<br>Disclosure<br>Constructive communication | 0.0039<br>0.0017<br>0.0050<br>0.95<br>0.094<br>0.11<br>0.030<br>0.16<br>0.41<br>0.26<br>0.012<br>0.0087<br>0.0021<br>0.62<br>0.064 |
