# Supplementary material for: Relationship Functioning and Gut Microbiota Composition among Older Adult Couples
Source: Int J Environ Res Public Health. 2023 Apr 7;20(8):5435. doi: 10.3390/ijerph20085435 (PMC10138905; doi:10.3390/ijerph20085435)
Supplement: Supplementary file 1 [file ijerph-20-05435-s001.zip]

Archive with 6 entries (6 files):
- Figure S1_revised.pdf
- Figure S2.pdf
- Figure S3.pdf
- Table S1.pdf
- Table S2_revised.pdf
- Table S3.pdf
